# Supplementary material for: Natural Biostimulant Attenuates Salinity Stress Effects in Chili Pepper by Remodeling Antioxidant, Ion, and Phytohormone Balances, and Augments Gene Expression
Source: MDPI journal article supplement (doi:10.3390/plants10112316), 2021-10-27
Supplement: s1 [file s1]

**Table S1.** A preliminary study conducted to assess the effect of salinity (5, 10, or 15 dS m<sup>-1</sup>), BH (Bee-honey at 10, 15, or 20 mL L<sup>-1</sup>), and BH-Sm (Bee-honey at 10 mL L<sup>-1</sup> + 0.25 mM silymarin) levels on some growth traits, instantaneous carboxylation efficiency (iCE), and chlorophyll content of chili pepper (*Capsicum frutescence* L.) plants

| Treatments         | Total leaf area plant <sup>-1</sup> (m <sup>2</sup> ) | Shoot dry weight plant <sup>-1</sup> (g) | Root dry weight plant <sup>-1</sup> (g) | iCE (μmol m <sup>-2</sup> s <sup>-1</sup> ) | Chlorophyll content (mg g <sup>-1</sup> FW) |
|--------------------|-------------------------------------------------------|------------------------------------------|-----------------------------------------|---------------------------------------------|---------------------------------------------|
| Control            | 329±22a                                               | 6.07±0.35a                               | 3.44±0.20a                              | 0.26±0.02a                                  | 2.32±0.09a                                  |
| Salinity(1)        | 263±14b                                               | 4.12±0.21b                               | 2.09±0.12b                              | 0.15±0.01b                                  | 1.11±0.04b                                  |
| <b>Salinity(2)</b> | <b>81±3c</b>                                          | <b>1.07±0.08c</b>                        | <b>0.91±0.10c</b>                       | <b>0.06±0.00c</b>                           | <b>0.51±0.02c</b>                           |
| Salinity(3)        | 15±0d                                                 | 0.11±0.0d                                | 0.09±0.0d                               | 0.0±0.0d                                    | 0.03±0.0d                                   |
| Control            | 329±22c                                               | 6.07±0.35c                               | 3.44±0.20c                              | 0.26±0.02c                                  | 2.32±0.09c                                  |
| BH(1)              | 368±26b                                               | 5.09±0.30b                               | 3.15±0.17b                              | 0.29±0.01b                                  | 2.48±0.10b                                  |
| <b>BH(2)</b>       | <b>392±32a</b>                                        | <b>5.60±0.44a</b>                        | <b>4.02±0.24a</b>                       | <b>0.33±0.02a</b>                           | <b>2.71±0.10a</b>                           |
| BH(3)              | 401±34a                                               | 5.55±0.46a                               | 4.07±0.30a                              | 0.32±0.02a                                  | 2.74±0.12a                                  |
| Control            | 329±22c                                               | 6.07±0.35c                               | 3.44±0.20c                              | 0.26±0.02c                                  | 2.32±0.09c                                  |
| BH-Sm(1)           | 388±30b                                               | 5.38±0.31b                               | 3.10±0.18b                              | 0.30±0.01b                                  | 2.54±0.11b                                  |
| <b>BH-Sm(2)</b>    | <b>445±38a</b>                                        | <b>6.25±0.52a</b>                        | <b>4.12±0.31a</b>                       | <b>0.34±0.01a</b>                           | <b>2.88±0.13a</b>                           |
| BH-Sm(3)           | 451±40a                                               | 6.27±0.56a                               | 4.16±0.30a                              | 0.34±0.01a                                  | 2.89±0.13a                                  |
| BH-Sm(4)           | 448±40a                                               | 6.27±0.54a                               | 4.18±0.34a                              | 0.35±0.01a                                  | 2.87±0.14a                                  |

The same letters with mean values±SE in each column indicate non-significant differences, and different letters indicate significant differences according to LSD test ( $P \leq 0.05$ ).

Salinity(1)= 5 dS m<sup>-1</sup> (3200 ppm NaCl), Salinity(2)= 10 dS m<sup>-1</sup> (6400 ppm NaCl), Salinity(3)= 15 dS m<sup>-1</sup> (9600 ppm NaCl), BH(1)= Bee-honey at 10 mL L<sup>-1</sup>, BH(2)= Bee-honey at 15 mL L<sup>-1</sup>, BH(3)= Bee-honey at 20 mL L<sup>-1</sup>, BH-Sm(1)= Bee-honey at 10 mL L<sup>-1</sup> + 0.25 mM silymarin in the same solution, BH-Sm(2)= Bee-honey at 10 mL L<sup>-1</sup> + 0.5 mM silymarin in the same solution, BH-Sm(3)= Bee-honey at 15 mL L<sup>-1</sup> + 0.25 mM silymarin in the same solution, BH-Sm(4)= Bee-honey at 15 mL L<sup>-1</sup> + 0.5 mM silymarin in the same solution.
